# Supplementary material for: Rapid synthesis of hierarchical SSZ-13 zeolite microspheres via a fluoride-assisted in situ growth route using aluminum isopropoxide as aluminum source
Source: Royal Society of Chemistry journal article supplement (doi:10.1039/c9ra08895d), 2020-01-01
Supplement: c9ra08895d1.pdf [file c9ra08895d1.pdf]

Electronic Supplementary Information for

**Rapid synthesis of hierarchical SSZ-13 zeolite microspheres via fluoride-assisted in situ growth route using aluminum isopropoxide as aluminum source**

**Liancheng Bing, Jiajia Liu, Kaifeng Yi, Fangni Li, Dezhi Han, Fang Wang and Guangjian Wang\***

*State Key Laboratory Base for Eco-Chemical Engineering in College of Chemical Engineering, Qingdao University of Science and Technology, Qingdao 266042, China.  
E-mail: wgjnet@126.com*

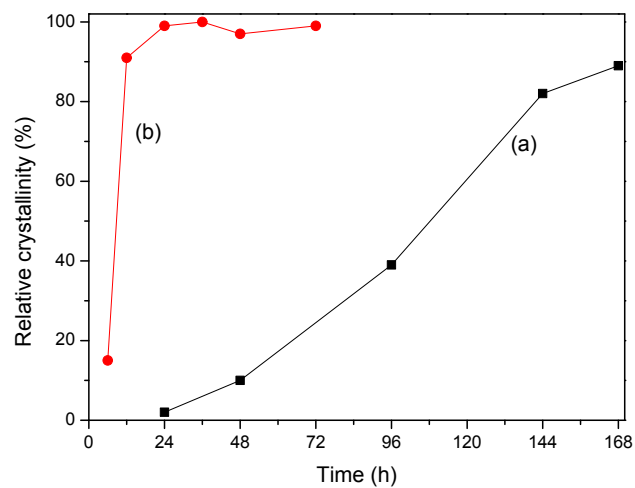

**Fig. S1** Crystallization curves of SSZ-13 synthesized (a) without HF and (b) with HF/Al<sub>2</sub>O<sub>3</sub> of 3.3

The relative crystallinity is based on the intensity of peak at 20.9° in XRD patterns, and fully crystallized SSZ-13 synthesized at 160 °C for 36 h with HF/Al<sub>2</sub>O<sub>3</sub> of 3.3 was designated as 100 % crystallinity.

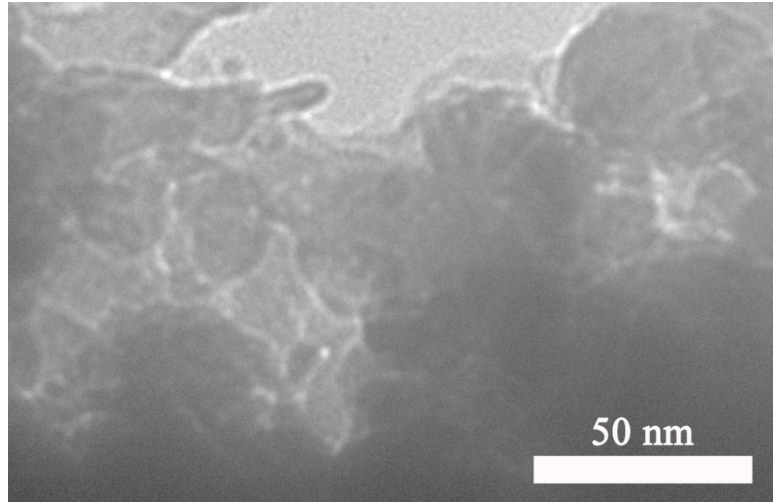

**Fig. S2** TEM image of SH-12 zeolite microspheres.

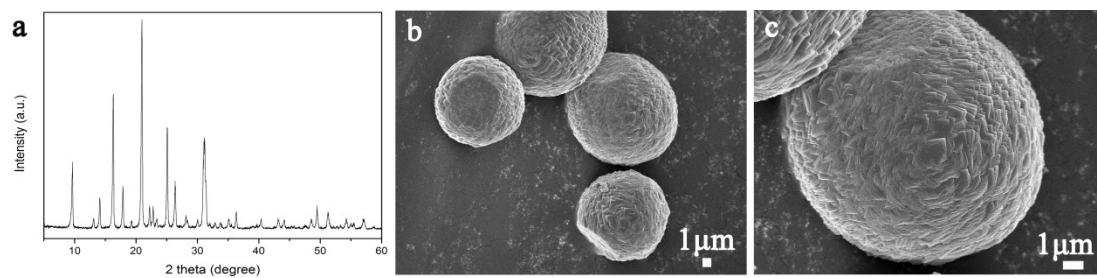

**Fig. S3** (a) XRD pattern, (b) and (c) SEM images of SSZ-13 synthesized by using aluminum isopropoxide and fumed silica as aluminum and silicon sources, respectively.

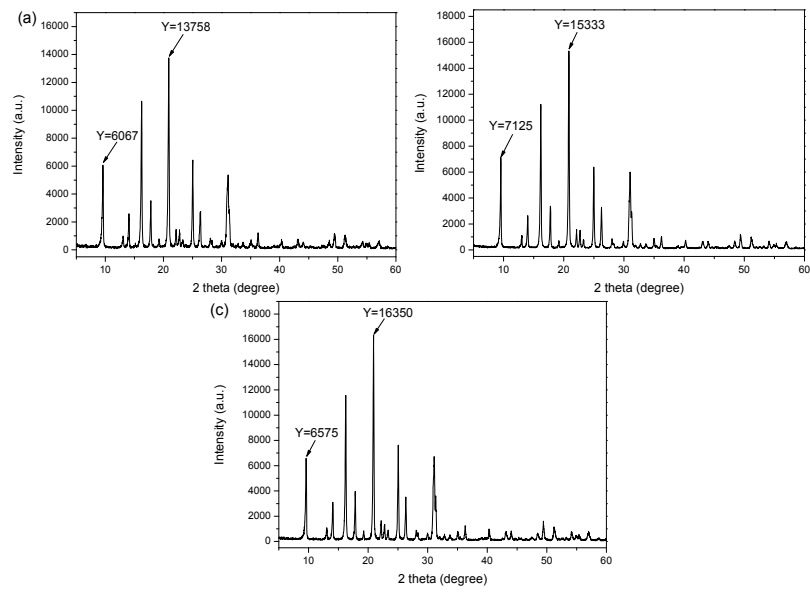

Fig. S4 XRD patterns of (a) SM-144, (b) SH-12 and SH-48.

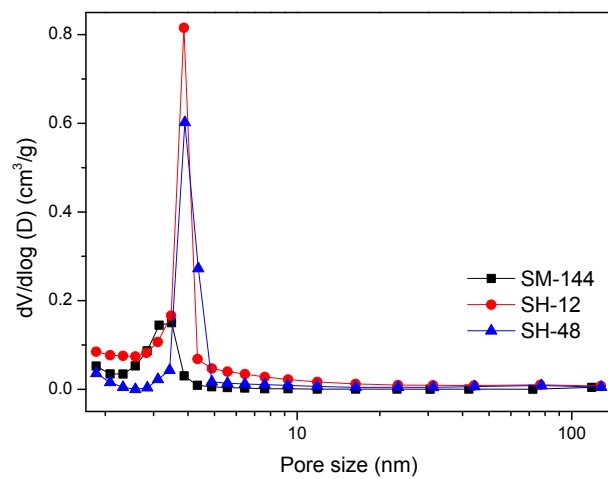

**Fig. S5** Pore size distribution of conventional microporous SSZ-13 and hierarchical SSZ-13 samples.

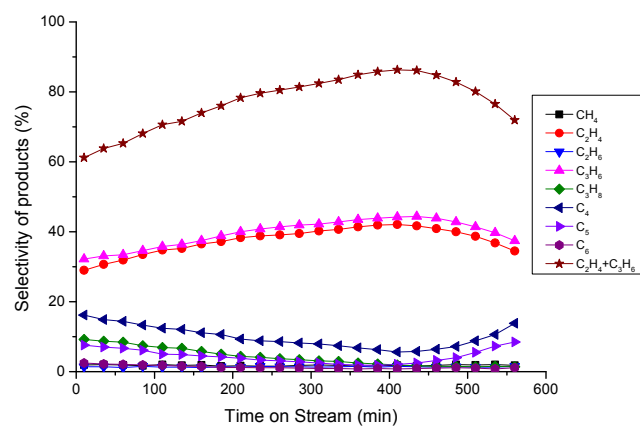

**Fig. S6** Products distribution in the conversion of methanol at 450 °C and WHSV = 3 h<sup>-1</sup> on SM-144 catalysts.

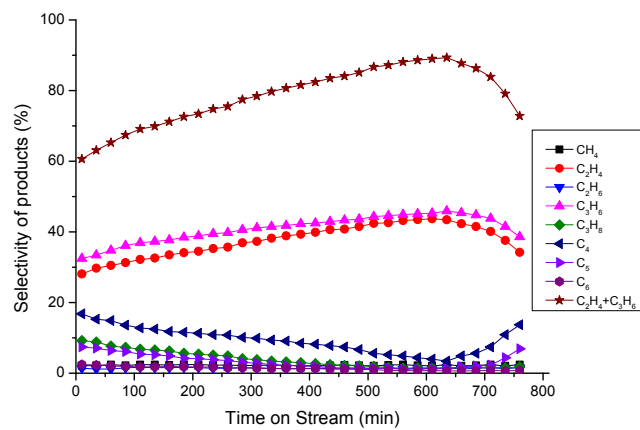

Fig. S7 Products distribution in the conversion of methanol at 450 °C and WHSV = 3 h<sup>-1</sup> on SH-12 catalyst.



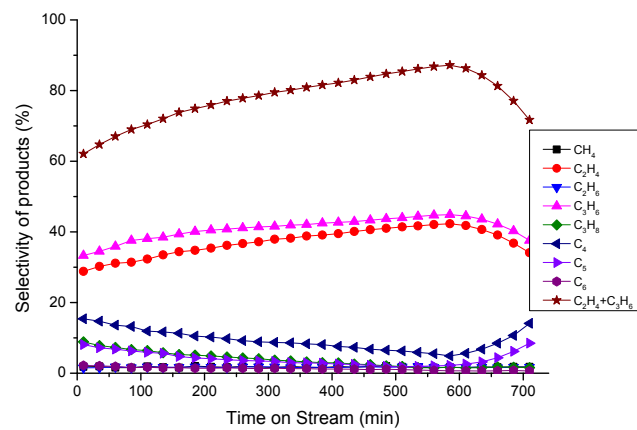

**Fig. S8** Products distribution in the conversion of methanol at 450 °C and WHSV = 3 h<sup>-1</sup> on SH-48 catalyst.

**Table S1** Physico-chemical properties of the conventional SSZ-13 (SM-144) and hierarchical SSZ-13 samples (SH-12 and SH-48)

| Sample | Si/Al | S <sub>BET</sub><br>(m <sup>2</sup> /g) | S <sub>micro</sub><br>(m <sup>2</sup> /g) | S <sub>external</sub><br>(m <sup>2</sup> /g) | V <sub>micro</sub><br>(cm <sup>3</sup> /g) | V <sub>meso</sub><br>(cm <sup>3</sup> /g) | V <sub>total</sub><br>(cm <sup>3</sup> /g) |
|--------|-------|-----------------------------------------|-------------------------------------------|----------------------------------------------|--------------------------------------------|-------------------------------------------|--------------------------------------------|
| SM-144 | 18    | 475                                     | 451                                       | 24                                           | 0.24                                       | 0.03                                      | 0.27                                       |
| SH-12  | 20    | 591                                     | 507                                       | 84                                           | 0.28                                       | 0.16                                      | 0.44                                       |
| SH-48  | 21    | 559                                     | 496                                       | 63                                           | 0.27                                       | 0.10                                      | 0.37                                       |

**Table S2** MTO results over conventional microporous SSZ-13 (SM-144) and hierarchical porous SSZ-13 (SH-12 and SH-48) catalysts

| Samples | TOS/min          | Selectivity of products/% |                               |                               |                               |                               |                                |                                                              |
|---------|------------------|---------------------------|-------------------------------|-------------------------------|-------------------------------|-------------------------------|--------------------------------|--------------------------------------------------------------|
|         |                  | CH <sub>4</sub>           | C <sub>2</sub> H <sub>4</sub> | C <sub>2</sub> H <sub>6</sub> | C <sub>3</sub> H <sub>6</sub> | C <sub>3</sub> H <sub>8</sub> | C <sub>4</sub> ~C <sub>6</sub> | C <sub>2</sub> H <sub>4</sub> +C <sub>3</sub> H <sub>6</sub> |
| SM-144  | 10               | 1.9                       | 29.0                          | 1.4                           | 32.2                          | 9.2                           | 26.3                           | 61.2                                                         |
|         | 260 <sup>a</sup> | 1.6                       | 39.1                          | 1.4                           | 41.4                          | 3.7                           | 12.8                           | 80.5                                                         |
| SH-12   | 10               | 2.1                       | 28.1                          | 1.4                           | 32.5                          | 9.2                           | 26.7                           | 60.6                                                         |
|         | 485 <sup>a</sup> | 2.2                       | 41.5                          | 1.3                           | 43.6                          | 2.1                           | 9.3                            | 85.1                                                         |
| SH-48   | 10               | 1.8                       | 28.8                          | 1.5                           | 33.3                          | 8.9                           | 25.7                           | 62.1                                                         |
|         | 410 <sup>a</sup> | 1.9                       | 39.5                          | 1.6                           | 42.7                          | 2.9                           | 11.4                           | 82.2                                                         |

<sup>a</sup> Catalyst lifetime is defined as the reaction time when methanol conversion less than 99%.
